# Supplementary material for: STAT5 is activated in macrophages by breast cancer cell-derived factors and regulates macrophage function in the tumor microenvironment
Source: PubMed Central journal article supplement (PMC8573892; doi:10.1186/s13058-021-01481-0), 2021-11-07
Supplement: 13058_2021_1481_MOESM1_ESM.pdf [file 13058_2021_1481_MOESM1_ESM.pdf]

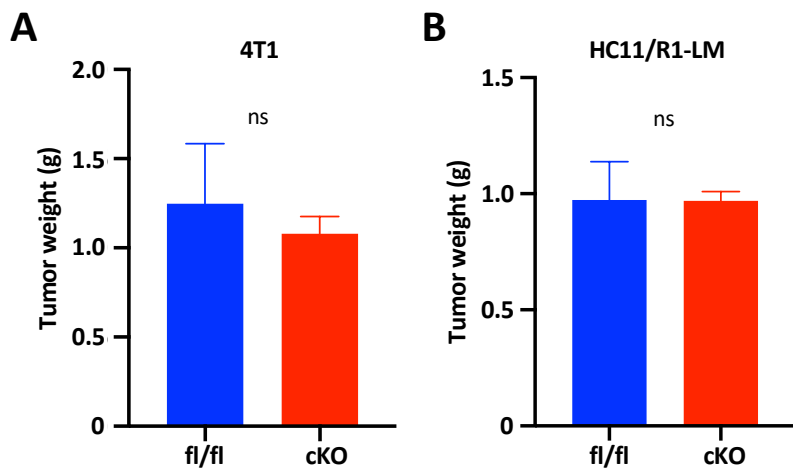

**Supplemental Figure 1. Tumor weight at size endpoint does not differ between  $STAT5^{fl/fl}$  and  $STAT5^{cKO}$  mice. A** Tumor weights of 4T1 tumors and **B** HC11/R1-LM tumors transplanted into  $STAT5^{fl/fl}$  (n = 5-13) or  $STAT5^{cKO}$  (n = 8-11) mice. % Survival on Y-axes indicates proportion of mice reaching tumor size endpoint of 1cm<sup>3</sup>, not disease-related death.

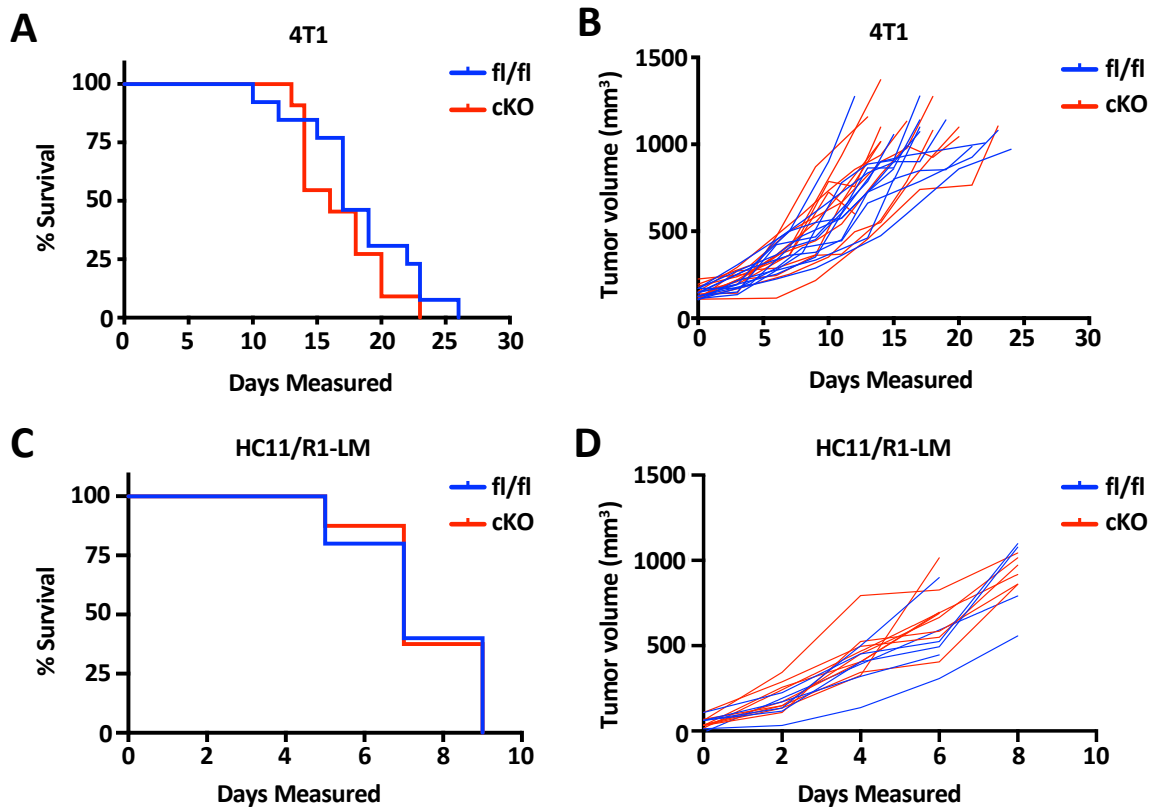

**Supplemental Figure 2. Deletion of STAT5 in myeloid cells does not impact overall tumor growth rate. A** Kaplan–Meier curves of 4T1 or **C** HC11/R1-LM tumors transplanted into STAT5<sup>fl/fl</sup> (n = 5-13) or STAT5<sup>cKO</sup> (n = 8-11) mice. % Survival on Y-axes indicates proportion of mice reaching tumor size endpoint of 1cm<sup>3</sup> (Day 0 = palpable tumor), not disease-related death. **B** Individual tumor growth rates from 4T1 and **D** HC11/R1-LM tumor-bearing mice (Day 0 = palpable tumor).
